# Supplementary material for: Novel highly divergent reassortant bat rotaviruses in Cameroon, without evidence of zoonosis
Source: PubMed Central journal article supplement (PMC5035928; doi:10.1038/srep34209), 2016-09-26
Supplement: srep34209-s1.pdf [file srep34209-s1.pdf]

**Title**

Novel highly divergent reassortant bat rotaviruses in Cameroon, without evidence of zoonosis.

**Authors**

Claude Kwe Yinda<sup>1,2</sup>; Mark Zeller<sup>1</sup>; Nádia Conceição-Neto<sup>1,2</sup>; Piet Maes<sup>2</sup>; Ward Deboutte<sup>1</sup>; Leen Beller<sup>1</sup>; Elisabeth Heylen<sup>1</sup>; Stephen Mbigha Ghogomu<sup>3</sup>; Marc Van Ranst<sup>2</sup>; Jelle Matthijnsens<sup>1\*</sup>

<sup>1</sup>*KU Leuven - University of Leuven, Department of Microbiology and Immunology, Laboratory of Viral Metagenomics, Rega Institute for Medical Research, Leuven, Belgium*

<sup>2</sup>*KU Leuven - University of Leuven, Department of Microbiology and Immunology, Laboratory for Clinical Virology, Rega Institute for Medical Research, Leuven, Belgium*

<sup>3</sup>*University of Buea, Department of Biochemistry and Molecular Biology, Molecular and cell biology laboratory, Biotechnology Unit, Buea, Cameroon*

\*Corresponding author.

**Email addresses:**

CKY: kweclaude.yinda@kuleuven.be

MZ: mark.zeller@kuleuven.be

NCN: nadia.neto@kuleuven.be

PM: piet.maes@kuleuven.be

WD: ward.deboutte@kuleuven.be

LB: leen.beller@kuleuven.be

EH: elisabeth.heylen@kuleuven.be

SMG: stephen.ghogomu@ubuea.cm

MVR: marc.vanranst@kuleuven.be

JM: jelle.matthijnsens@kuleuven.be

















**Supplementary data S2:** Nucleotide percentage similarity between primers and corresponding sequences of Cameroonian bat RVA strains. -: 5' or 3'-end amplification failed.

| Name of primer                                       | BatLy03<br>G25P[43] | BatLi08<br>G31P[42] | BatLi09<br>G30P[42] | BatLy17<br>G30P[47] | BatLi10<br>G30P[42] | Reference (PMCID) |
|------------------------------------------------------|---------------------|---------------------|---------------------|---------------------|---------------------|-------------------|
| <b>Outer capsid glycoprotein VP7 forward primers</b> |                     |                     |                     |                     |                     |                   |
| Beg9                                                 | 96.4                | 57.1                | -                   | 85.7                | -                   | 2155916           |
| sBeg9                                                | 100                 | 57.1                | -                   | 90.5                | -                   | 2155916           |
| 9Con1-L                                              | 100                 | 100                 | -                   | 100                 | -                   | 7929782           |
| <b>Outer capsid glycoprotein VP7 reverse primer</b>  |                     |                     |                     |                     |                     |                   |
| EndA                                                 | 78.2                | 91.3                | 95.7                | -                   | -                   | 10364621          |
| VP7-Rdeg                                             | 95.0                | 95.0                | 100                 | -                   | -                   | 11264359          |
| End9                                                 | 85.1                | 66.7                | 59.3                | -                   | -                   | 2155916           |
| RVG9                                                 | 89.5                | 63.2                | 63.2                | -                   | -                   | 2155916           |
|                                                      |                     |                     |                     |                     |                     |                   |
| <b>Outer capsid protein VP4 forward primers</b>      |                     |                     |                     |                     |                     |                   |
| VP4-1-17F                                            | 88.8                | 88.8                | 77.8                | 94.4                | -                   | 22189107          |
| Con3                                                 | 72.7                | 68.2                | 72.7                | 63.6                | 72.7                | 1320625           |
| <b>Outer capsid protein VP4 reverse primer</b>       |                     |                     |                     |                     |                     |                   |
| Con2                                                 | 85.7                | 81.0                | 81.0                | 76.2                | 81.0                | 1320625           |

**Supplementary data S3:** Phylogenetic trees of nucleotide sequences of the RVA VP6 sequence.

HRVA: Human RVA VP6 sequence from patients exposed to bats; open triangle: Cameroonian bat RVA strains; Other bat RVA: KE4582, MSLH14 and MYAS33. Bootstrap values (1000 replicates) above 70% are shown. Scale represent number of nucleotide substations per site.

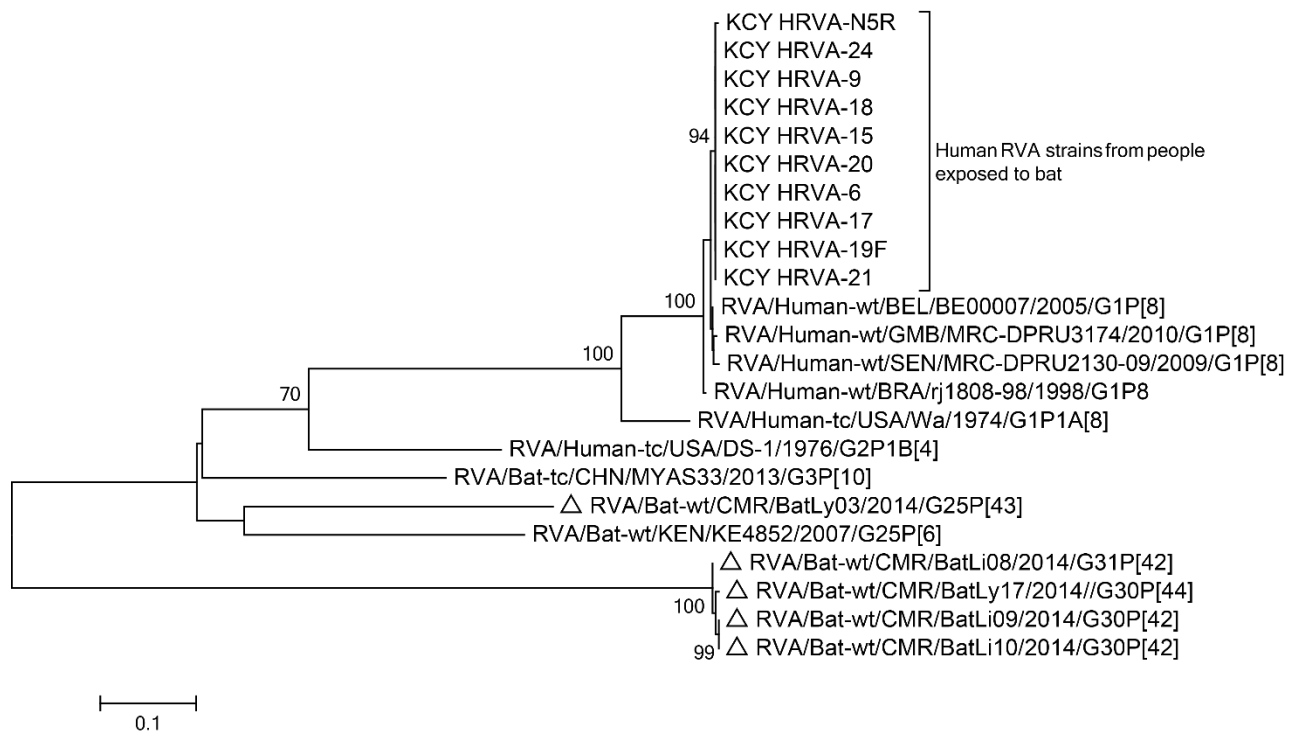

**Supplementary data S4: List of primers used for the completion of genome and screening**

| <b>Description</b>                                                      | <b>Primer name</b>             | <b>Primer sequence (5'→3')</b>    |
|-------------------------------------------------------------------------|--------------------------------|-----------------------------------|
| Screening primers for human and bat RVAs                                | RVA-VP6_40F                    | GCK AGR GAC AAR ATT GTY GAA GG    |
|                                                                         | RVA-VP6_1083R                  | GWC CAA TTC ATR CCT GGT GGA       |
| Primers for completing segments of RVA/Bat-wt/CMR/BatLy03/2014/G25P[43] | RVA59_VP1_301-322R             | TTA GCT AAT TTA CCC TCA ACG G     |
|                                                                         | RVA59_VP1_328-349F             | AAG CTA ACG TCA GAA TTA TTC GC    |
|                                                                         | RVA59_VP1_737-758R             | GCT ACT AAG ATT GAC ATT GGT G     |
|                                                                         | RVA59_VP1_2991-3013F           | GTC AAT AAA CTA TGG CTG TTA CC    |
|                                                                         | RVA59_VP1_3048-3072F           | ATT AAT TCG TAT ACC CTT CAA AGG T |
|                                                                         | RVA59_VP3_76-100F              | CAA TCT TAT GCT GAT ACT CAA ACG   |
|                                                                         | RVA59_VP3_787-809R             | TGT CAA ATT GTG AAA TAC GTC GC    |
|                                                                         | RVA59_VP3_1795-1818F           | CGT TAT CTG GTT ACA TAT TTA GAG   |
|                                                                         | RVA59_VP4_2063-2084F           | GAA CAG ATG GTA GAT TTT TCG C     |
|                                                                         | RVA59_VP4_171-195R             | TAC AGT TGT TGA ATC GTT AAT TTC C |
| Primers for completing segments of RVA/Bat-wt/CMR/BatLi10/2014/G30P[42] | RVA46_VP4_118-137_F            | TTA CGC ACC AGT GAA TTG GG        |
|                                                                         | RVA46_VP4_839-860_R            | ACC ACT TAT ATC CTA AAC CAC C     |
|                                                                         | RVA46_VP7_172-191_F            | TCA ATG GAC GTT GTG TTG GC        |
|                                                                         | RVA46_VP7_803-823_R            | GAT TTG TTG TTG GAT CTG ACG       |
| Primers for the amplification of 5' and 3' ends of VP7 and VP4 segments | RVA63_VP7-5'-227_R             | TTA CTAGAC TCA TGT CCA TCG        |
|                                                                         | RVA63_VP7-3'-839_F             | AGT ATT ACA AGT TGG AGG TGC       |
|                                                                         | RVA894_VP7-5'-202_R            | TGT AAC CGG TAT GTT CAA TCC       |
|                                                                         | RVA894_VP7-3'-788_F            | GTA AGA AAA TCG GAC CTA GAG       |
|                                                                         | RVA59_VP7-5'-213_R             | TCC ATT GAT CCA GTA ATT GGC       |
|                                                                         | RVA59_VP7-3'-843_F             | TAT AAC AGC AGA TCC AAC GAC       |
|                                                                         | RVA63_VP4-5'-230_R             | ATA CCC AAT TAT CGA CTG CTG       |
|                                                                         | RVA63_VP4-3'-2143_F            | CTT GTA ACT GAT TCA CCA GTC       |
|                                                                         | RVA59_VP4-5'-214_R             | AAA TTC TGT TGG CTG ATA GGG       |
|                                                                         | RVA59_VP4-3'-2100_F            | AGA TTT TTC GCA TAT AAA GTG AGC   |
| RVA894_VP4-5'-158_R                                                     | TAC TGT TGA GTC ATT TAC TTC CC |                                   |
|                                                                         | RVA894_VP4-3'-2072_F           | GAA CAG ATG GTA GAT TTT TCG C     |
